# Supplementary material for: Advanced Sampling Technique in Radiology Free-Text Data for Efficiently Building Text Mining Models by Deep Learning in Vertebral Fracture
Source: MDPI journal article supplement (doi:10.3390/diagnostics14020137), 2024-01-08

## Supplementary tables

Supplementary table S1. Demonstration and comparison of the predictive effects of semantic text mining models built using the samples drawn by different sampling methods (A) sampling ratio of 1/10 (B) sampling ratio of 1/20 (C) sampling ratio of 1/30, and (D) sampling ratio of 1/40

Supplementary table S1(A). Sampling ratio of 1/10

|                                | Sampling ratio 1/10 (N = 2,766 in training set, N = 24,635 in test set) |                            |                         |                         |
|--------------------------------|-------------------------------------------------------------------------|----------------------------|-------------------------|-------------------------|
|                                | Vector sum minimization                                                 | Vector sum maximization    | Stratified sampling     | Simple random sampling  |
| AUROC (95% CIs)                | 0.981 (0.980 to 0.983)*                                                 | 0.746 (0.740 to 0.751)*    | 0.965 (0.963 to 0.967)* | 0.956 (0.954 to 0.958)* |
| Difference in AUROC (95% CIs)  |                                                                         |                            |                         |                         |
| Versus simple random sampling  | 0.025 (0.023 to 0.027)*                                                 | −0.210 (−0.205 to −0.216)* | 0.009 (0.008 to 0.010)* | -                       |
| Versus stratified sampling     | 0.016 (0.014 to 0.018)*                                                 | −0.220 (−0.214 to −0.225)* | -                       | -                       |
| Versus vector sum maximization | 0.236 (0.230 to 0.242)*                                                 | -                          | -                       | -                       |

Supplementary table S1(B). Sampling ratio of 1/20

|                                | Sampling ratio 1/20 (N = 1,392 in training set, N = 26,009 in test set) |                            |                         |                         |
|--------------------------------|-------------------------------------------------------------------------|----------------------------|-------------------------|-------------------------|
|                                | Vector sum minimization                                                 | Vector sum maximization    | Stratified sampling     | Simple random sampling  |
| AUROC (95% CIs)                | 0.963 (0.961 to 0.965)*                                                 | 0.684 (0.678 to 0.690)*    | 0.916(0.913 to 0.919)*  | 0.889 (0.885 to 0.893)* |
| Difference in AUROC (95% CIs)  |                                                                         |                            |                         |                         |
| Versus simple random sampling  | 0.074 (0.071 to 0.078)*                                                 | −0.205 (−0.199 to −0.211)* | 0.027 (0.025 to 0.029)* | -                       |
| Versus stratified sampling     | 0.047 (0.044 to 0.050)*                                                 | −0.232 (−0.226 to −0.239)* | -                       | -                       |
| Versus vector sum maximization | 0.279 (0.272 to 0.285)*                                                 | -                          | -                       | -                       |

Supplementary table S1(C). Sampling ratio of 1/30

|                                | Sampling ratio 1/30 (N = 936 in training set, N = 26,465 in test set) |                            |                         |                         |
|--------------------------------|-----------------------------------------------------------------------|----------------------------|-------------------------|-------------------------|
|                                | Vector sum minimization                                               | Vector sum maximization    | Stratified sampling     | Simple random sampling  |
| AUROC (95% CIs)                | 0.907 (0.904 to 0.911)*                                               | 0.638 (0.632 to 0.643)*    | 0.843 (0.839 to 0.847)* | 0.815 (0.810 to 0.819)* |
| Difference in AUROC (95% CIs)  |                                                                       |                            |                         |                         |
| Versus simple random sampling  | 0.093 (0.089 to 0.097)*                                               | -0.177 (-0.169 to -0.185)* | 0.028 (0.025 to 0.032)* | -                       |
| Versus stratified sampling     | 0.064 (0.062 to 0.067)*                                               | -0.205 (-0.198 to -0.213)  | -                       | -                       |
| Versus vector sum maximization | 0.270 (0.263 to 0.277)*                                               | -                          | -                       | -                       |

Supplementary table S1(D). Sampling ratio of 1/40

|                                | Sampling ratio 1/40 (N = 706 in training set, N = 26,695 in test set) |                            |                         |                         |
|--------------------------------|-----------------------------------------------------------------------|----------------------------|-------------------------|-------------------------|
|                                | Vector sum minimization                                               | Vector sum maximization    | Stratified sampling     | Simple random sampling  |
| AUROC (95% CIs)                | 0.895 (0.891 to 0.899)*                                               | 0.633 (0.628 to 0.639)*    | 0.820 (0.816 to 0.825)* | 0.802 (0.797 to 0.807)* |
| Difference in AUROC (95% CIs)  |                                                                       |                            |                         |                         |
| Versus simple random sampling  | 0.093 (0.089 to 0.097)*                                               | -0.168 (-0.161 to -0.176)* | 0.019 (0.014 to 0.023)* | -                       |
| Versus stratified sampling     | 0.075 (0.071 to 0.078)*                                               | -0.187 (-0.180 to -0.194)* | -                       | -                       |
| Versus vector sum maximization | 0.262 (0.254 to 0.269)*                                               | -                          | -                       | -                       |

\*P value &lt; 0.001

‡AUROC: area under the receiver operating characteristics

†95% CIs: 95% confidence intervals

**Supplementary Fig S1. Algorithm of building semantic text mining models using LSTM network**

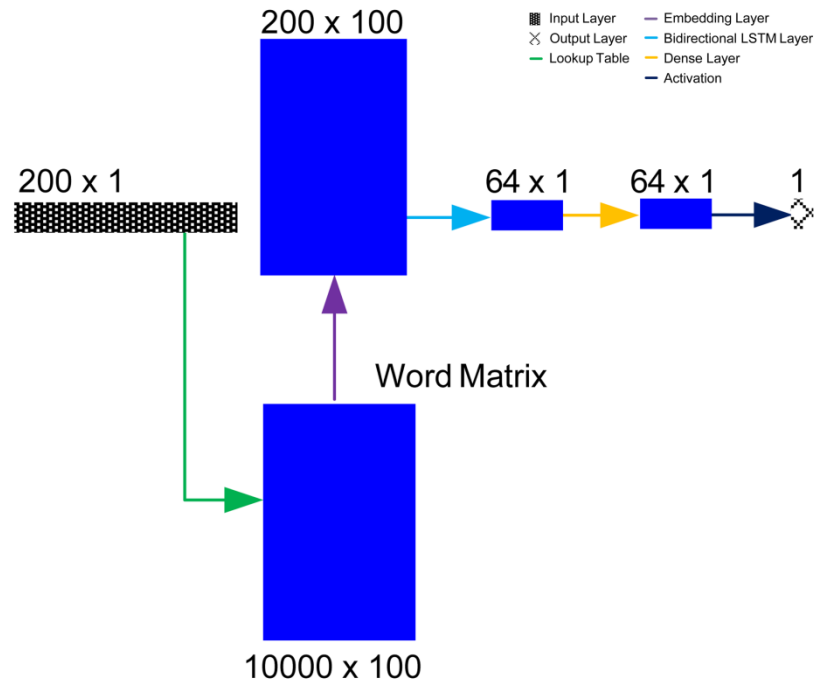

\*LSTM: long short-term memory

#The settings of the process were (1) the length of input sequences (input dimensions):  $200 \times 1$ ; (2) the word matrix:  $10000 \times 100$ ; (3) the feature extraction:  $200 \times 100$ ; (4) mapping:  $64 \times 1$  (5) output dimension: 1

**Supplementary Fig S2. Applying hierarchical agglomerative clustering by document vectors to divide into 46 groups expressed in 2-dimension**

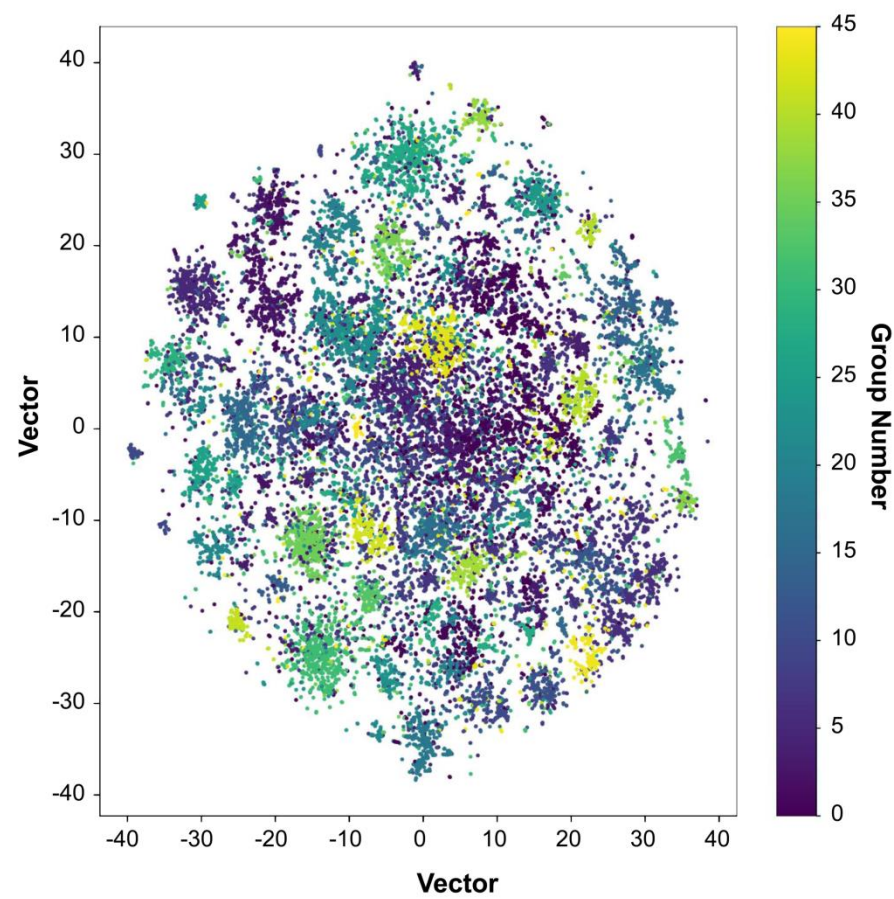

Supplement: s1 [file s1]
